# Supplementary material for: The Role and Mechanism of Exosome-Mediated miR-875-3p in Targeting SLC39A14 to Regulate Ferroptosis in Osteosarcoma Proliferation, Migration, and Invasion
Source: Research Square preprint supplement (doi:10.21203/rs.3.rs-8181974/v1), 2025-12-05
Supplement: Supplementary file 1 [file 7e43a0b8d21b576498ae14c7.docx]

**Informed Consent Form for Participation in Research**研究参与者知情同意书

Study Title: The Role and Mechanism of Exosome‑Mediated miR‑875‑3p in Targeting SLC39A14 to Regulate Ferroptosis in Osteosarcoma Proliferation, Migration, and Invasion
研究课题：外泌体介导的 miR‑875‑3p 靶向 SLC39A14 调控铁死亡在骨肉瘤增殖、迁移与侵袭中的作用与机制

| **Protocol/Version & Date** *方案编号/版本与日期* | [Protocol No._____] Version: v1.0  [方案编号_____] 版本：v1.0 |
| --- | --- |
| **Institution** *机构名称* | The First Affiliated Hospital of Guangxi Medical University 广西医科大学第一附属医院 |
| **Department** *科室* | Department of Bone and Joint Surgery 骨与关节外科 |
| **Principal Investigator(s)** *主要研究者* | Mingyang Jiang, MD; Zhandong Bo, MD (Co‑PIs) 蒋铭杨 医师；薄占东 医师（共同负责人） |
| **Contact (Phone/Email)** *联系方式（电话/邮箱）* | Email: 202120576@sr.gxmu.edu.cn; drrbozhandong@126.com 邮箱：202120576@sr.gxmu.edu.cn；drrbozhandong@126.com |
| **Ethics Committee (IRB) Approval** *伦理委员会（IRB）批准* | Approved by Ethics Committee of Guangxi Medical University (Approval No.: [_____]) 经广西医科大学伦理委员会批准（批准号：[_____]） |

Please read this form carefully. It explains the purpose of this study, what will happen if you take part, possible risks and benefits, and your rights. You will receive a signed copy.

请仔细阅读本同意书。它说明了本研究的目的、参与后将进行的程序、可能的风险与受益，以及您的权利。您将获得一份签字后的副本。

**1) Purpose of the Study / 1）研究目的**

We are studying how small vesicles called exosomes carry microRNA (miR‑875‑3p) that may regulate a gene named SLC39A14 and influence a cell‑death process (ferroptosis) in osteosarcoma. Understanding these mechanisms may help develop future diagnostic or therapeutic strategies. This research is not a treatment and will not change your current medical care.

本研究旨在探讨外泌体所携带的微小RNA（miR‑875‑3p）是否通过调控名为 SLC39A14 的基因影响骨肉瘤中的铁死亡过程。阐明其机制有望为未来的诊断或治疗提供依据。本研究并非治疗手段，且不会改变您当前的临床诊疗。

**2) Why You Are Being Asked / 2）您为何被邀请**

You have been diagnosed with osteosarcoma and are scheduled for surgery. We are asking for your permission to use a small portion of surgical tissue that would otherwise be discarded, including tumor tissue and nearby non‑tumorous tissue (>5 cm from the tumor margin).

您被诊断为骨肉瘤，计划接受手术治疗。我们拟征得您的同意，在不影响手术与诊疗的前提下，使用手术中本将废弃的一小部分组织样本，包括肿瘤组织及距肿瘤边缘大于5厘米的邻近非肿瘤组织。

**3) What Will Happen If You Join / 3）参与后将进行哪些操作**

If you agree: (a) Surgical residual tissue will be collected during your planned operation; (b) Exosomes will be isolated from these tissues for laboratory tests (microscopy, gene/protein assays, and related analyses); (c) We may review basic clinical information from your medical record such as age, sex, diagnosis, treatment, and outcomes. No extra procedures are required beyond your standard care.

若您同意：(a) 在既定手术中采集手术残余组织；(b) 研究人员将从组织中分离外泌体并进行实验室检测（显微观察、基因/蛋白检测及相关分析）；(c) 研究可能查阅您的病历中基本信息，如年龄、性别、诊断、治疗与转归。本研究不额外增加超出常规医疗的操作。

**4) Risks and Discomforts / 4）可能的风险与不适**

Because samples are obtained from tissue that would otherwise be discarded, physical risks are minimal. The main risk is loss of privacy or confidentiality. We will minimize this risk by removing direct identifiers and storing data on secure, access‑controlled systems. Genetic or molecular testing results from this research will not be added to your medical record and will not be used for clinical decisions.

由于样本来源于本将废弃的手术组织，身体风险极低。主要风险为隐私或保密性泄露。我们将通过去除直接身份标识、采用权限控制与安全存储等措施尽量降低该风险。研究产生的遗传/分子检测结果不会写入您的病历，也不会用于临床决策。

**5) Benefits / 5）可能受益**

You will not receive direct medical benefit from taking part. The knowledge gained may benefit future patients with osteosarcoma.

您参与本研究不会获得直接的医疗受益；但研究所得知识可能惠及未来的骨肉瘤患者。

**6) Confidentiality and Data/Sample Management / 6）保密与数据/样本管理**

Your samples and data will be labeled with a study code. A master list linking the code to your identity will be stored separately with restricted access. Materials will be kept for up to [__ years] after study completion (unless regulations require a longer period). Publications will not contain information that can identify you.

您的样本与数据将使用研究编码标识。连接编码与您身份的信息表将单独保管，且仅限授权人员访问。样本与数据将在研究结束后保存[__年]（如法规要求更长期限则依规执行）。发表的论文不会包含可识别您身份的信息。

**7) Costs and Compensation / 7）费用与补偿**

There is no cost to you for participating. You will not receive payment or financial compensation unless specified by hospital policy.

参与本研究无需您承担任何费用。除非医院政策另有规定，您将不会因参与本研究而获得金钱补偿。

**8) Voluntary Participation and Withdrawal / 8）自愿参与与退出**

Joining the study is entirely voluntary. You may refuse or withdraw at any time without penalty and without affecting your medical care. If you withdraw, unused samples will be destroyed; data already analyzed or published cannot be removed.

是否参与完全出于自愿。您可在任何时间拒绝或撤回，不会受到惩罚，也不影响您的医疗。若您撤回，未使用的样本将被销毁；已分析或已发表的数据无法删除。

**9) Future Use and Data Sharing (Please choose) / 9）未来使用与数据共享（请勾选）**

☐ I ALLOW my de‑identified samples/data to be stored and used in future ethically approved research without contacting me again.
☐ I DO NOT allow future use; destroy remaining samples after this study.
☐ You MAY contact me for future studies.
☐ You MAY share de‑identified data with collaborators or public repositories as required by journals/regulations.

☐ 我同意在不再次联系我的情况下，将去标识化的样本/数据用于今后经伦理批准的研究。
☐ 我不同意未来使用；本研究结束后请销毁剩余样本。
☐ 同意研究团队在未来研究时联系我。
☐ 同意根据期刊/法规要求向合作方或公共数据库共享去标识化数据。

**10) Results and Publication / 10）结果与发表**

Study findings may be published or presented at conferences. Your identity will not be revealed.

研究结果可能发表于期刊或在学术会议上报告，但不会泄露您的身份信息。

**11) Questions or Complaints / 11）咨询与投诉**

If you have questions about the study, please contact the study team at the numbers/emails above. For concerns about your rights as a research participant, you may contact the Ethics Committee of Guangxi Medical University (IRB) at: [phone/email].

如对研究有任何疑问，请通过上述电话/邮箱联系研究团队。若您对作为受试者的权益有疑虑，可联系广西医科大学伦理委员会（IRB）：[电话/邮箱]。

**12) Consent and Signatures / 12）同意与签名**

By signing below, I confirm that I have read and understood this form, had my questions answered, and voluntarily agree to participate. I will receive a signed copy.

在下方签名即表示：我已阅读并理解本同意书，相关问题已得到解答，我自愿同意参加本研究，并将获得一份签字副本。

**Participant (≥18 years) / 受试者（年满18岁）**

Name（姓名）: __________________________ Signature（签名）: __________________________ Date（日期）: ________/________/________

**Parent/Legal Guardian (for participants <18 years) / 法定监护人（适用于未满18岁者）**

Name（姓名）: __________________________ Signature（签名）: __________________________ Date（日期）: ________/________/________

**Assent of Minor / 未成年人同意**

Name（姓名）: __________________________ Signature（签名）: __________________________ Date（日期）: ________/________/________

**Person Obtaining Consent (Investigator) / 获得同意的研究者**

Name（姓名）: __________________________ Signature（签名）: __________________________ Date（日期）: ________/________/________

Please sign two copies: one for the participant and one for the study file.
签署两份：一份交受试者，一份存档。
