# Supplementary material for: The Role and Mechanism of Exosome-Mediated miR-875-3p in Targeting SLC39A14 to Regulate Ferroptosis in Osteosarcoma Proliferation, Migration, and Invasion
Source: Research Square preprint supplement (doi:10.21203/rs.3.rs-8181974/v1), 2025-12-05
Supplement: Supplementary file 2 [file 8c380e423dbd6722e49491a5.docx]

**Primer:**

ZEB1 (hsa) Fwd-5’AGTGTTACCAGGGAGGAGCAGTG-3’ (Sangon Biotech, CN)

ZEB1 (hsa) Rev-5’TTTCTTGCCCTTCCTTTCCTGTGTC-3’ (Sangon Biotech, CN)

GPX4 (hsa) Fwd-5’TGCTCTGTGGGGCTCTGG-3’ (Nanning GenSys biotechnology, CN)

GPX4 (hsa) Rev-5’GATGTCCTTGGCGGAAAACT-3’ (Nanning GenSys biotechnology, CN)

ACSL4 (hsa) Fwd-5’CCGACCTAAGGGAGTGATGAT-3’ (Nanning GenSys biotechnology, CN)

ACSL4 (hsa) Rev-5’CAGAGAGTGTAAGCGGAGAAGAA-3’ (Nanning GenSys biotechnology, CN)

xCT (hsa) Fwd-5’TCCCCCGTGTGTCCCTAC-3’ (Nanning GenSys biotechnology, CN)

xCT (hsa) Rev-5’TGATAATGGAGACTCCCCTCAG-3’ (Nanning GenSys biotechnology, CN)

miR-875-3p (hsa) GCCTGGAAACACTGAGGTTGTG

**Antibody:**

| CD63 (WB) | Primary antibody: 1:700, Source: Rabbit, product number: bsm-52384R, Bioss, Beijing, CN |
| --- | --- |
| CD63 (WB) | Secondary antibody: Goat Anti-Rabbit IgG H&L, 1:5000, ab205718, abcam, Cambridge, UK |
| Calnexin (WB) | Primary antibody: 1:20000, Source: Rabbit, catalog number: 10427-2-AP, Proteintech Group, IL, USA |
| Calnexin (WB) | Secondary antibody: Goat Anti-Rabbit IgG H&L, 1:5000, ab205718, abcam, Cambridge, UK |
| TSG101 (WB) | Primary antibody: 1:8000, Source: Rabbit, catalog number: 28283-1-AP, Proteintech Group, IL, USA |
| TSG101 (WB) | Secondary antibody: Goat Anti-Rabbit IgG H&L, 1:5000, ab205718, abcam, Cambridge, UK |
| HSP70 (WB) | Primary antibody: 1:10000, Source: Rabbit, catalog number: 10995-1-AP, Proteintech Group, IL, USA |
| HSP70 (WB) | Secondary antibody: Goat Anti-Rabbit IgG H&L, 1:5000, ab205718, abcam, Cambridge, UK |
| ACSL4 (WB) | Primary antibody: 1:5000, Source: Mouse, catalog number: 66617-1-Ig, Proteintech Group, IL, USA |
| ACSL4 (WB) | Secondary antibody: 1:5000, Goat Anti-Mouse IgG (H+L), Catalog number: SA00001-1, Proteintech Group, IL, USA |
| GPX4 (WB) | Primary antibody: 1:3000, Source: Mouse, catalog number: 67763-1-Ig, Proteintech Group, IL, USA |
| GPX4 (WB) | Secondary antibody: 1:5000, Goat Anti-Mouse IgG (H+L), Catalog number: SA00001-1, Proteintech Group, IL, USA |
| xCT (WB) | Primary antibody: 1:3000, Source: Rabbit, datasheet: TA385257, OriGene, MD, USA |
| xCT (WB) | Secondary antibody: Goat Anti-Rabbit IgG H&L, 1:5000, ab205718, abcam, Cambridge, UK |
| GAPDH (WB) | Primary antibody: 1:100000, Source: Mouse, catalog number: 60004-1-Ig, Proteintech Group, IL, USA |
| GAPDH (WB) | Secondary antibody: 1:5000, Goat Anti-Mouse IgG (H+L), Catalog number: SA00001-1, Proteintech Group, IL, USA |
